# Supplementary material
Source: Elsevier journal article supplement (https://orbilu.uni.lu/bitstream/10993/26526/5/mmc4.xls)
Supplement: mmc4 [file mmc4.xls]

## Sheet: Sheet1
Human Sequences
L27 – F	CTG GTG GCT GGA ATT GAC
L27 – R	ACA GAG TAC CTT GTG GGC
DJ-1-F	GTGCAGGTCCTACTGCTCTG
DJ-1-R	ATTGCAAGCGCAAACTCGAA
GR-F	TGATCAGCACCAACTGCACG
GR-R	TTCCAAGCCCGACAAAGTCT
GLS2_F	TGGGTGTTTGCTTCAGATTCCA
GLS2_R	TCATGTCCACCCCCTTAGGA
SHMT2_F	CTGCACAGTGGGGAGTCAAT
SHMT2_R	GTCAGTGCCAGGTTGAGCTT
GLDC_F	GGCCCATCGGAGTGAAGAAA
GLDC_R	TATCGCAGTTTCCGTGGCTT
G6PDH-F	ACATTGCCCGCAACATCAAC
G6PDH-R	GTTCTGGTCTCGGAAAGGCA
MTHFD1-F	AAGTCTACACGAAGCAGGGC
MTHFD1-R	GGCATTGTGCTCATCGTTCC
MTHFD2-F	CCTGGTTGGCGAGAATCCTG
MTHFD2-R	GCTCTGGAAGAGGCAACTGAA
Mouse sequences
DJ-1_F	CACACCCACTGGCTAAGGAC
DJ-1_R	TTTGAGAACAAGCGGTGCCT
IRG1_F	GCAACATGATGCTCAAGTCTG
IRG1_R	TGCTCCTCCGAATGATACCA
TNFa_F	GGTTCTGTCCCTTTCACTCAC
TNFa_R	TGCCTCTTCTGCCAGTTCC
L27_F	ACATTGACGATGGCACCTC
L27_R	GCTTGGCGATCTTCTTCTTG
iNOS_F	AGCCCTCACCTACTTCCTG
iNOS_R	CAATCTCTGCCTATCCGTCTC
